# Supplementary material
Source: PubMed Central journal article supplement (PMC4283139)
Supplement: NIHMS647991-supplement-Supplemental_Table.pdf [file NIHMS647991-supplement-Supplemental_Table.pdf]

Supplementary Table 1. Spearman ranked correlations of enriched human PMNs compared to enriched murine Neutrophils.

| Correlations of genes significant at $p < 0.001$                           |                  |                  |                  |                  |                   |                   |                   |
|----------------------------------------------------------------------------|------------------|------------------|------------------|------------------|-------------------|-------------------|-------------------|
|                                                                            | Human PMNS Day 0 | Human PMNS Day 1 | Human PMNS Day 4 | Human PMNS Day 7 | Human PMNS Day 14 | Human PMNS Day 21 | Human PMNS Day 28 |
| Murine PT Neutrophil 2hr                                                   | 0.04             | -0.07            | -0.07            | -0.03            | -0.08             | 0.07              | 0.01              |
| Murine PT Neutrophil Day 1                                                 | 0.09             | 0.01             | 0.00             | 0.03             | 0.00              | 0.11              | 0.03              |
| Murine PT Neutrophil Day 3                                                 | 0.11             | 0.07             | 0.07             | 0.11             | 0.09              | 0.21              | 0.08              |
| Correlations of genes significant at $p < 0.001$ and a fold change $> 1.5$ |                  |                  |                  |                  |                   |                   |                   |
|                                                                            | Human PMNS Day 0 | Human PMNS Day 1 | Human PMNS Day 4 | Human PMNS Day 7 | Human PMNS Day 14 | Human PMNS Day 21 | Human PMNS Day 28 |
| Murine PT Neutrophil 2hr                                                   | 0.21             | 0.18             | 0.31             | 0.22             | 0.11              | 0.21              | 0.13              |
| Murine PT Neutrophil Day 1                                                 | 0.22             | 0.23             | 0.40             | 0.30             | 0.21              | 0.30              | 0.26              |
| Murine PT Neutrophil Day 3                                                 | 0.23             | 0.27             | 0.43             | 0.38             | 0.32              | 0.34              | 0.31              |
